# Supplementary material
Source: Springer Nature journal article supplement (https://www.springermedizin.de/resource/supplementary/13058_2011_2921_MOESM12_ESM.pdf/9702836)

**A**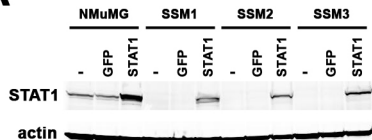**B**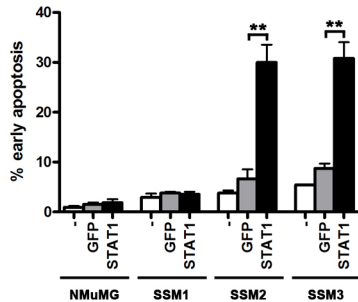**C**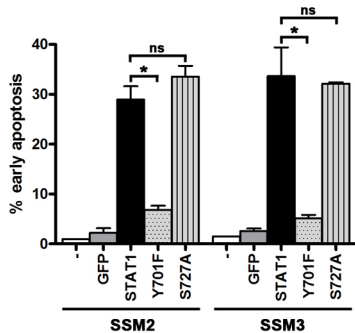

Supplement: MOESM12 [file 9702836]
